# Supplementary material for: Electrochemical performance improvement of N-doped graphene as electrode materials for supercapacitors by optimizing the functional groups
Source: Royal Society of Chemistry journal article supplement (doi:10.1039/c4ra12383b), 2015-01-01
Supplement: c4ra12383b1.pdf [file c4ra12383b1.pdf]

### Supporting Information

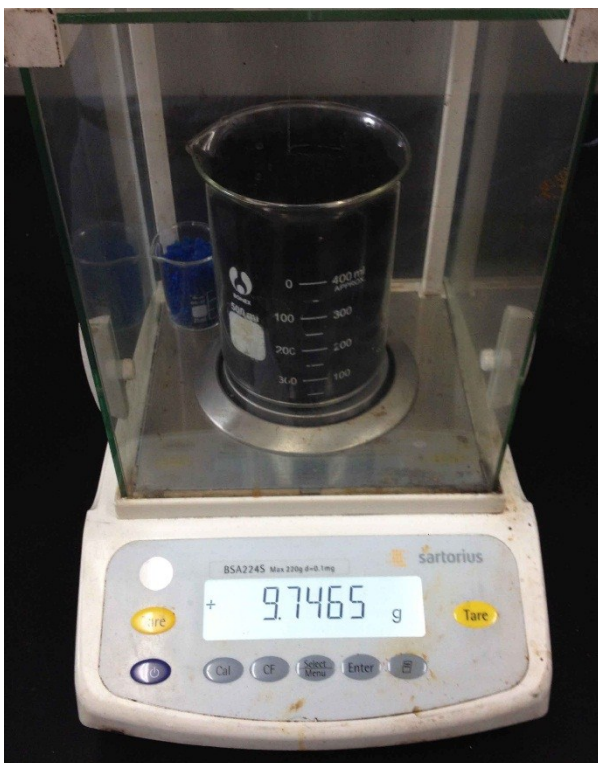

**Figure S1.** One photograph of large-scale reduced graphene oxide materials (9.7465 g, about 500 mL).

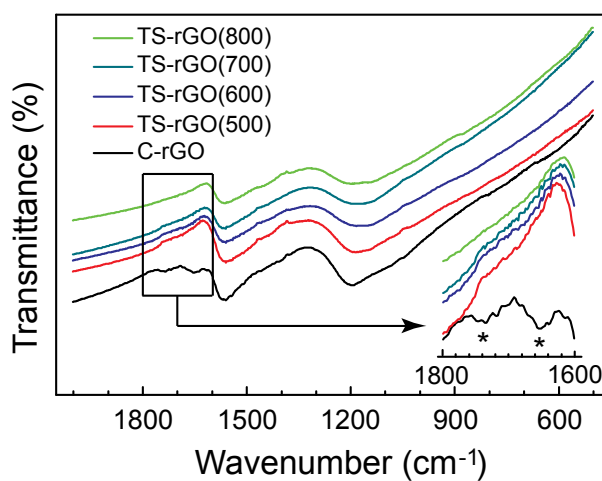

**Figure S2.** FT-IR spectra of C-rGO and TS-rGO prepared at various temperature from 500°C to 800°C.

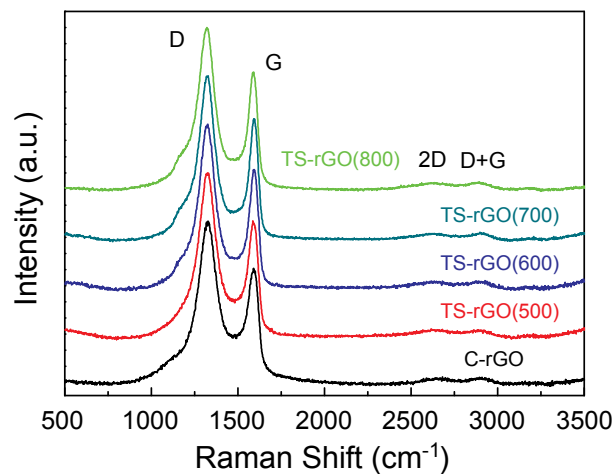

**Figure S3.** Raman spectra of C-rGO and TS-rGO prepared at various temperature from 500°C to 800°C.

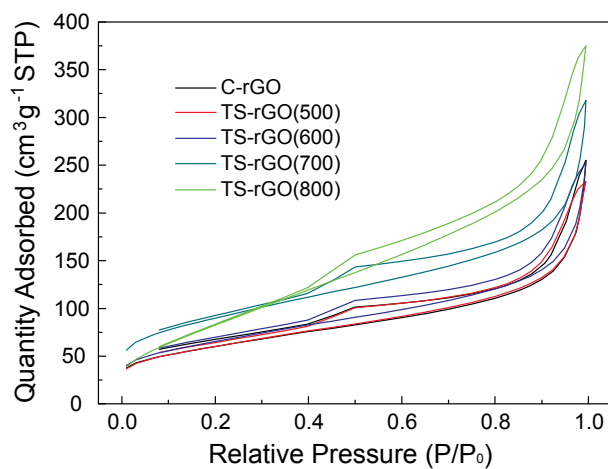

**Figure S4.** N<sub>2</sub> adsorption/desorption isotherms of C-rGO and TS-rGO materials prepared at various temperature from 500°C to 800°C.

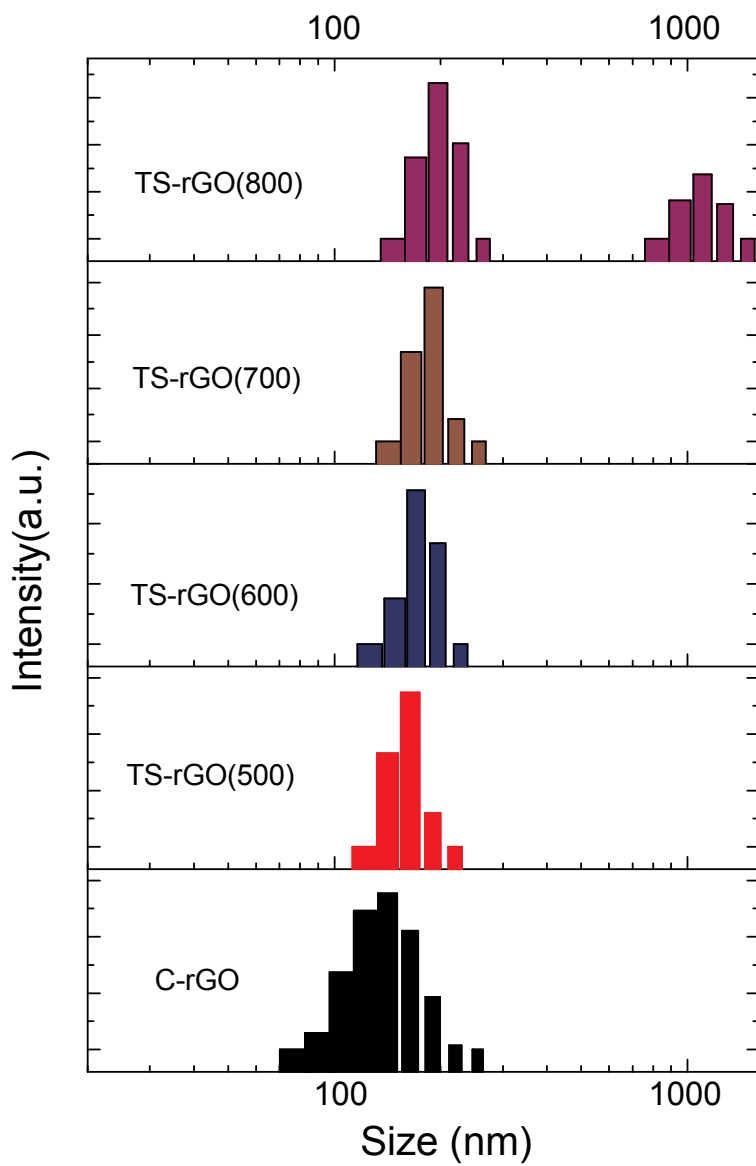

**Figure S5.** Particle size distribution of C-rGO and TS-rGO materials prepared at various temperature from 500°C to 800°C.

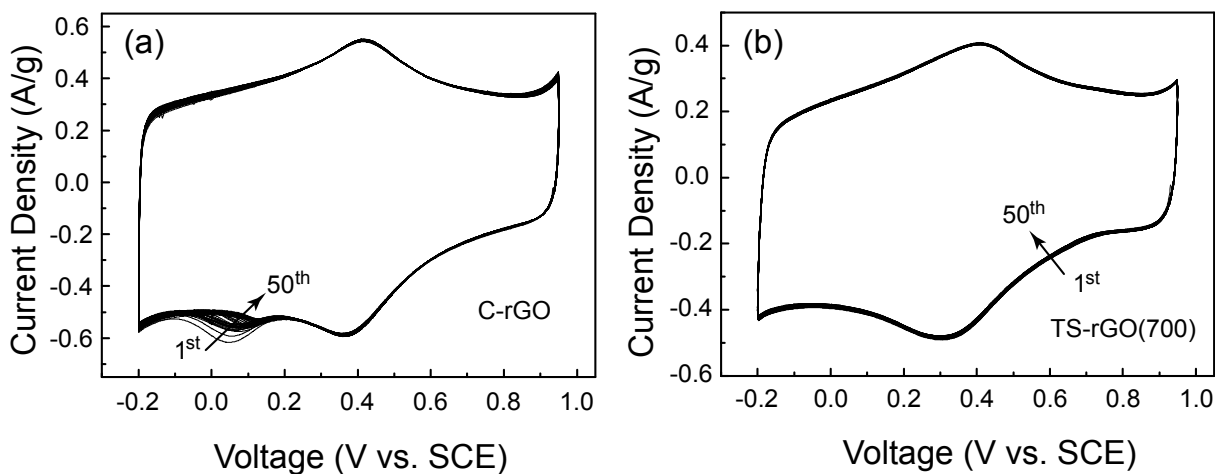

**Figure S6.** Comparison of CV curves for C-rGO and TS-rGO(700) at a scan rate of 2 mV/s.

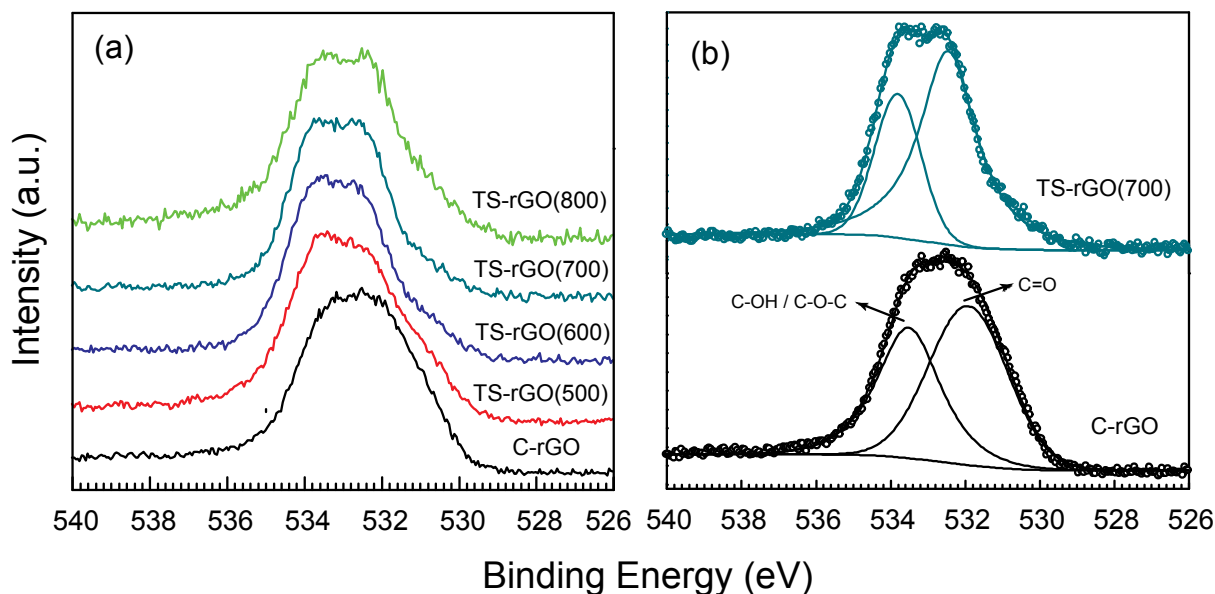

**Figure S7.** (a) Comparisons of O1s XPS profiles of C-rGO and TS-rGO materials prepared at various temperature from 500°C to 800°C. (b) The experimental and fitted O1s XPS profiles of C-rGO and TS-rGO(700).

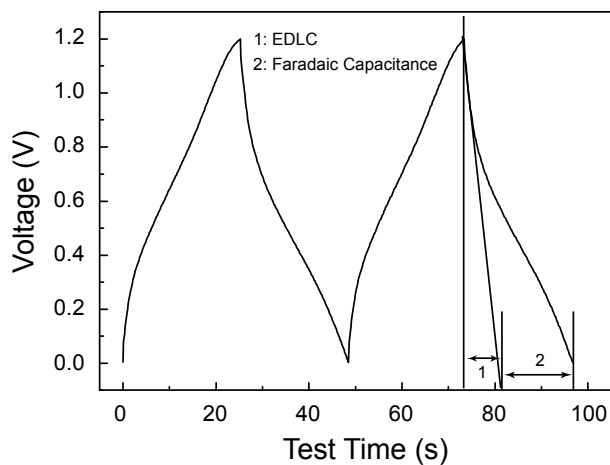

**Figure S8.** Galvanostatic charge/discharge curves of TS-rGO(700) material at a current density of 4A/g in 1 mol/L H<sub>2</sub>SO<sub>4</sub> aqueous solution containing 0.1 mol/L VO<sup>2+</sup>/VO<sub>3</sub><sup>-</sup> ions.

**Table S1** Intensity ratios of D-band to G-band in Raman spectra of C-rGO and TS-rGO materials.

| Samples                        | C-rGO | TS-rGO(500) | TS-rGO(600) | TS-rGO(700) | TS-rGO(800) |
|--------------------------------|-------|-------------|-------------|-------------|-------------|
| I <sub>D</sub> /I <sub>G</sub> | 1.41  | 1.42        | 1.39        | 1.36        | 1.38        |
